# Supplementary material for: Phosphine-substituted sterically encumbered pyrrolyl ligands – synthesis and reactivity studies
Source: Royal Society of Chemistry journal article supplement (doi:10.1039/c3dt52205a), 2013-01-01
Supplement: c3dt52205a.pdf [file c3dt52205a.pdf]

*Supporting Information for*

**Phosphine-substituted sterically encumbered  
pyrrolyl ligands – Synthesis and reactivity studies**

*Markus Kreye, Jason W. Runyon, Matthias Freytag, Peter G. Jones and Marc D. Walter\**

**Table of Contents:**

|                                                |           |
|------------------------------------------------|-----------|
| <b>1. NMR Spectra of 3-Li(thf)<sub>2</sub></b> | <b>S2</b> |
| <b>2. NMR Spectra of 4-Mn(CO)<sub>3</sub></b>  | <b>S3</b> |

## 1. NMR Spectra of 3-Li(thf)<sub>2</sub>

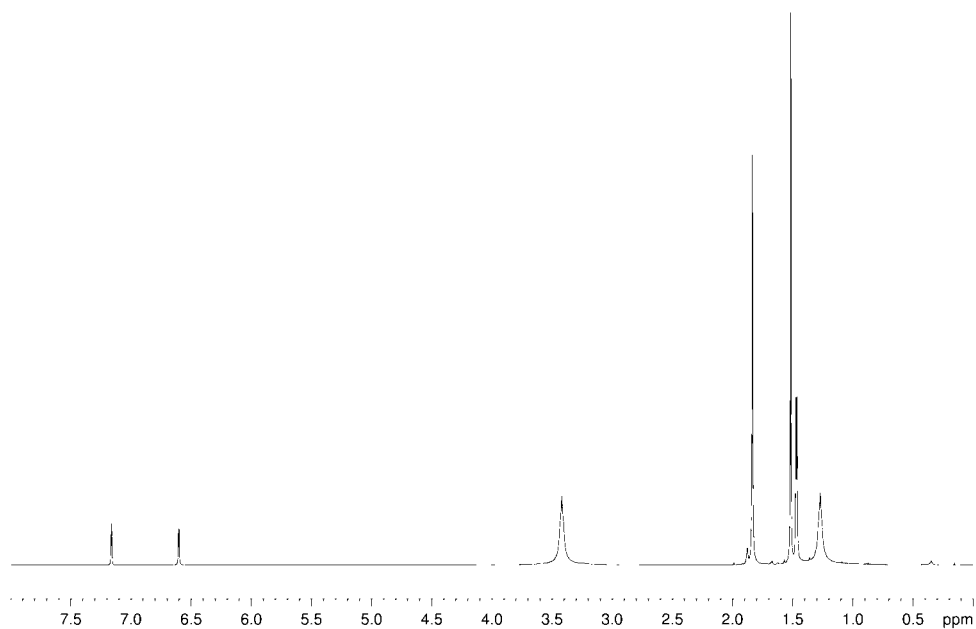

**Figure S1.** <sup>1</sup>H NMR spectrum of **3-Li(thf)<sub>2</sub>** recorded in C<sub>6</sub>D<sub>6</sub> at 22 °C.

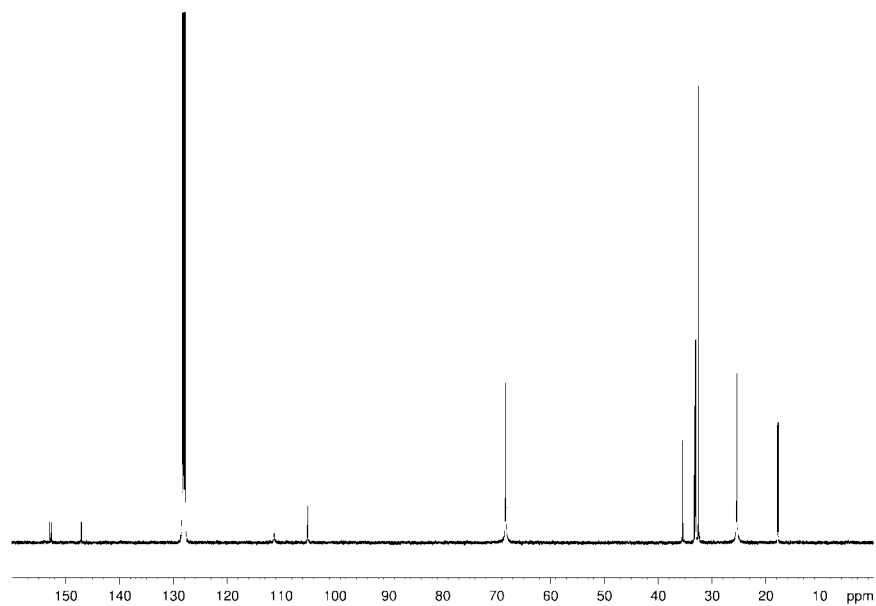

**Figure S2.** <sup>13</sup>C{<sup>1</sup>H} NMR spectrum of **3-Li(thf)<sub>2</sub>** recorded in C<sub>6</sub>D<sub>6</sub> at 22 °C.

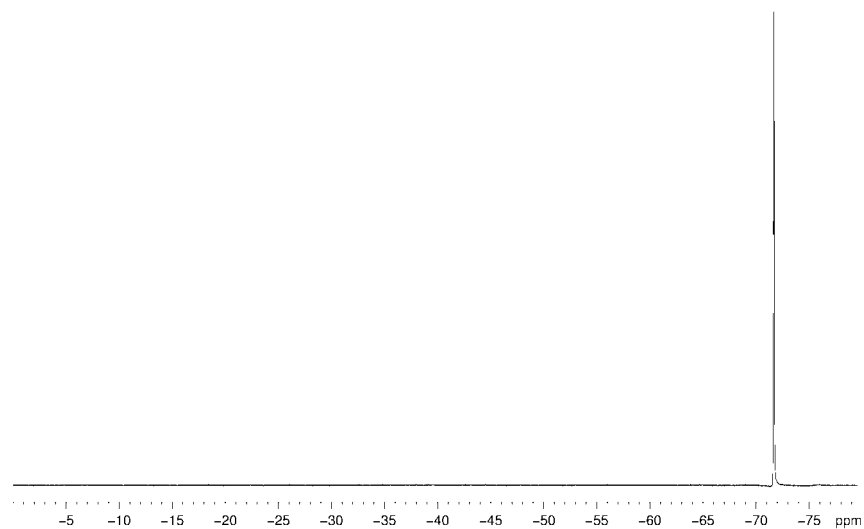

**Figure S3.**  $^{31}\text{P}\{^1\text{H}\}$  NMR spectrum of **3-Li(thf)<sub>2</sub>** recorded in  $\text{C}_6\text{D}_6$  at 22 °C.

## 2. NMR Spectra of **4-Mn(CO)<sub>3</sub>**

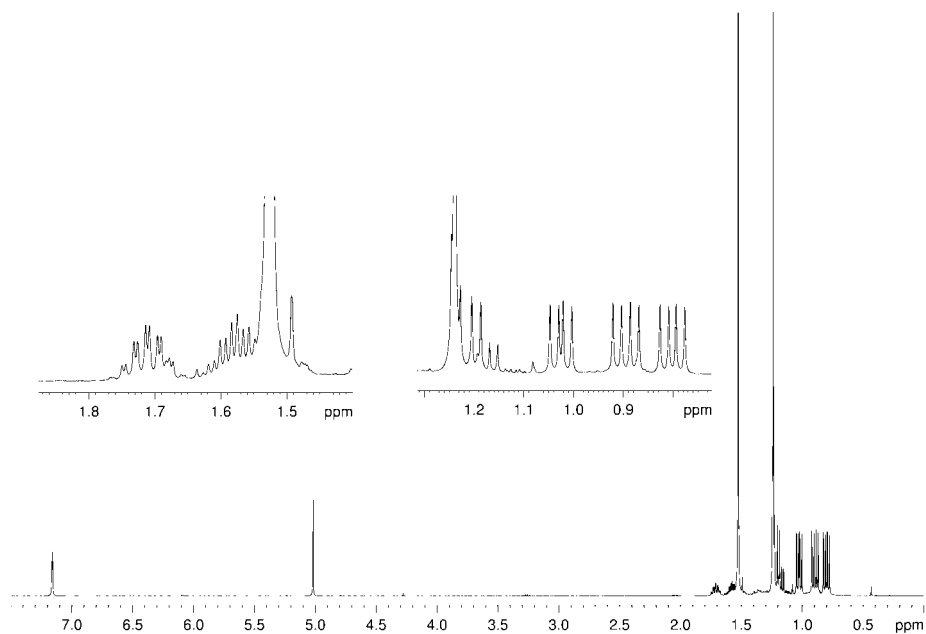

**Figure S4.**  $^1\text{H}$  NMR spectrum of **4-Mn(CO)<sub>3</sub>** recorded in  $\text{C}_6\text{D}_6$  at 22 °C.

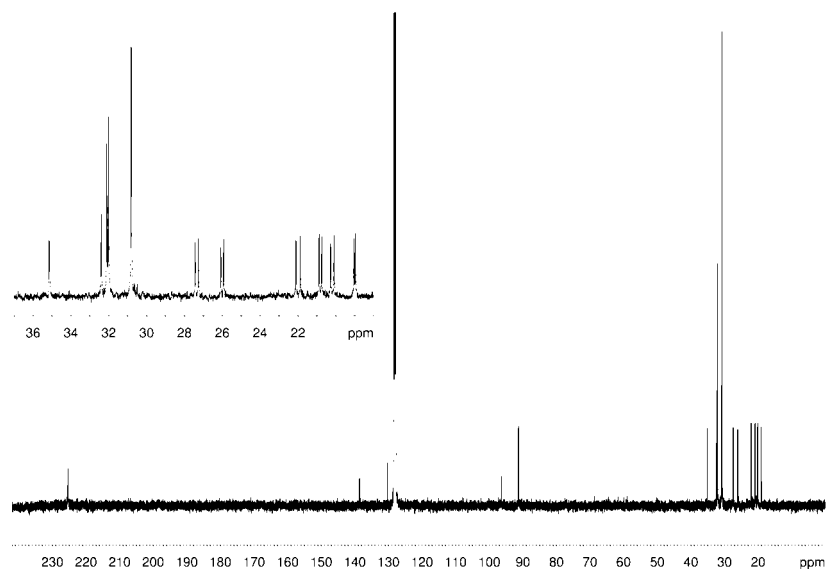

**Figure S5.**  $^{13}\text{C}\{^1\text{H}\}$  NMR spectrum of **4-Mn(CO)<sub>3</sub>** recorded in  $\text{C}_6\text{D}_6$  at 22 °C.

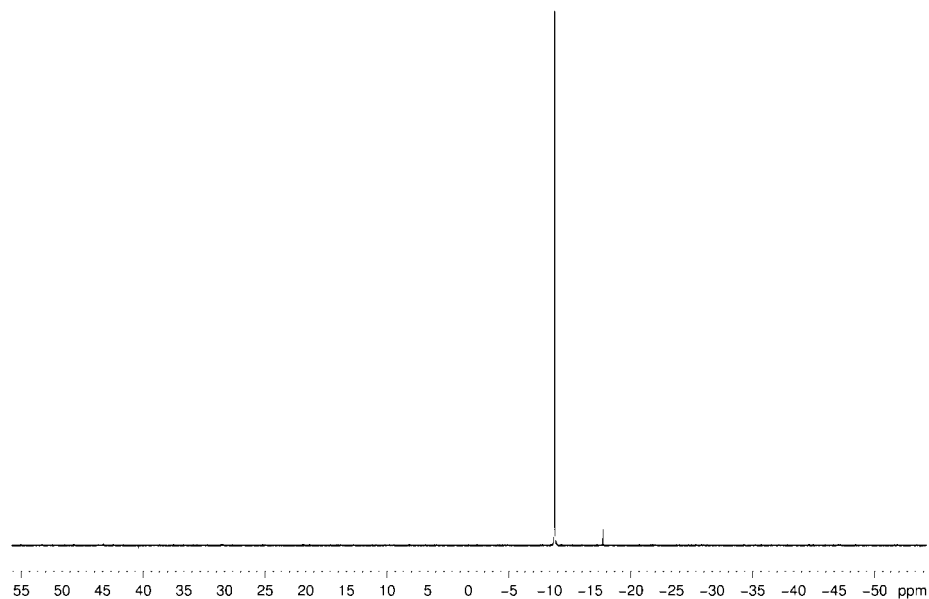

**Figure S6.**  $^{31}\text{P}\{^1\text{H}\}$  NMR spectrum of **4-Mn(CO)<sub>3</sub>** recorded in  $\text{C}_6\text{D}_6$  at 22 °C.

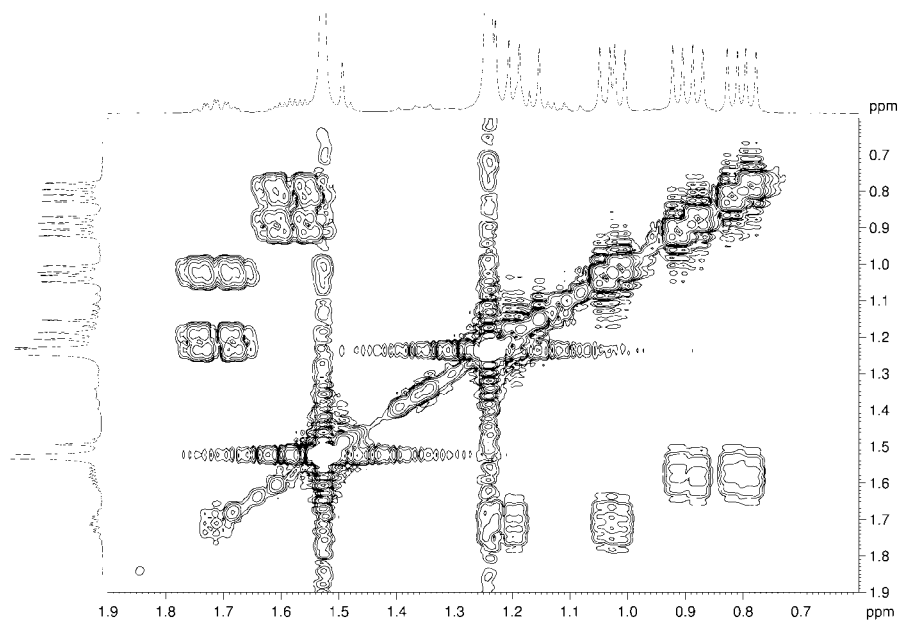

**Figure S7.**  $^1\text{H}$ - $^1\text{H}$ -COSY NMR spectrum of **4-Mn(CO)<sub>3</sub>** recorded in  $\text{C}_6\text{D}_6$  at 22 °C.

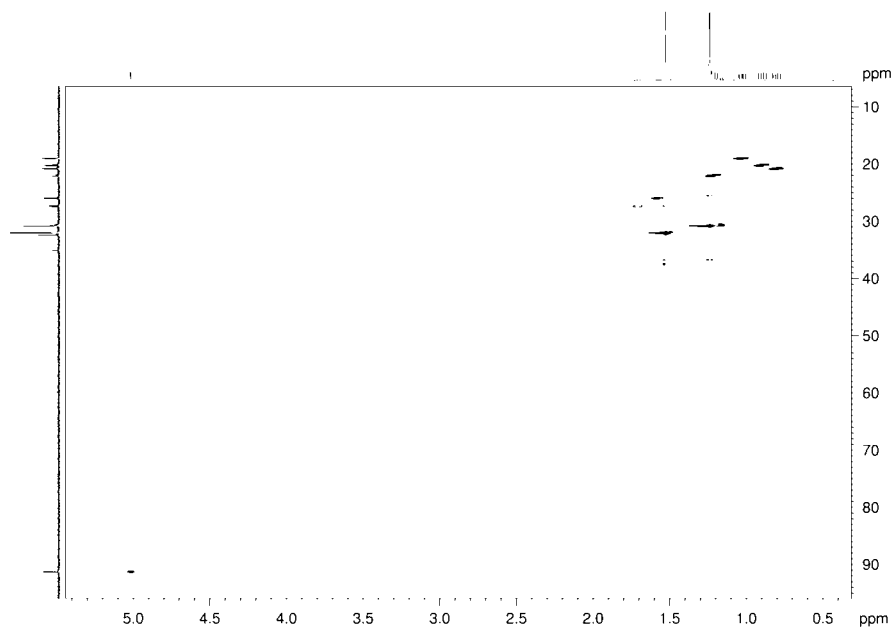

**Figure S8a.**  $^1\text{H}$ - $^{13}\text{C}$ -HMBC NMR spectrum of **4-Mn(CO)<sub>3</sub>** recorded in  $\text{C}_6\text{D}_6$  at 22 °C.

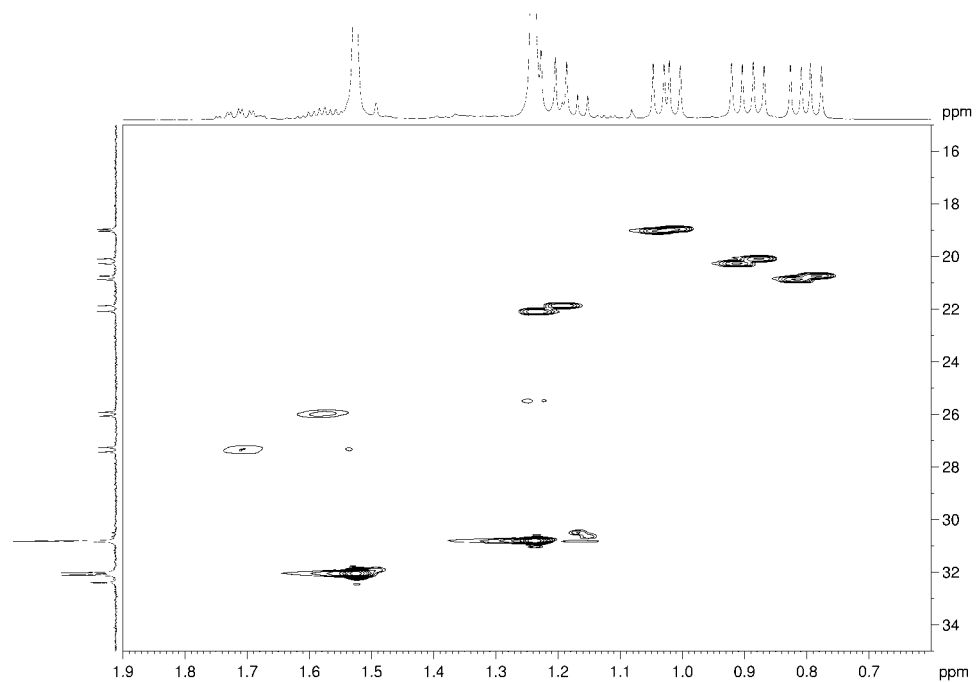

**Figure S8b.**  $^1\text{H}$ - $^{13}\text{C}$ -HMBC NMR spectrum of **4-Mn(CO)<sub>3</sub>** recorded in  $\text{C}_6\text{D}_6$  at 22 °C.
